# Supplementary material for: Training and food marketing in the informal dairy sector increase child milk intake in Kenya
Source: Research Square preprint supplement (doi:10.21203/rs.3.rs-8284278/v1), 2026-02-17
Supplement: Supplementary file 1 [file 7f78d76ad1bedf9c74b04cba.docx]

**Supplementary information**

**Training and food marketing in the informal dairy sector increase child milk intake in Kenya**

Silvia Alonso, Jef L Leroy, Emmanuel Muunda, Moira Donahue Angel, Emily Kilonzi, Giordano Palloni, Paula Dominguez-Salas, Richard Biegon, Jane Poole, Delia Grace

Contents

[1. Milk marketing materials 2](#_Toc215831301)

[2. Laboratory protocols 2](#_Toc215831302)

[3. Dietary intake estimation 9](#_Toc215831305)

[4. Computation of covariates 12](#_Toc215831314)

[5. Lee bounds 13](#_Toc215831318)

[6. Lee bound results 14](#_Toc215831319)

[7. Comparison of Total Bacterial counts to East Africa Standards for raw cow milk. 20](#_Toc215831322)

[8. References 21](#_Toc215831323)

## Milk marketing materials

- - MoreMilk campaign [logo sticker 1](https://hdl.handle.net/10568/140648) (used in all posters, dustcoat, cap and measuring jar)
  - MoreMilk campaign [logo sticker 2](https://hdl.handle.net/10568/140650)
  - MoreMilk [calendar](https://hdl.handle.net/10568/140645)
  - MoreMilk poster/sticker graduating girl ([English](https://cgspace.cgiar.org/bitstreams/09b6ec6f-831d-45fb-b806-060d5894f75c/download) / [Swahili](https://cgspace.cgiar.org/bitstreams/a5b8f56b-d654-4994-a5c0-71f2ff5aeb6b/download))
  - MoreMilk poster/sticker running kids ([English](https://cgspace.cgiar.org/bitstreams/1e5045a6-8b2e-4985-8084-0b29b5a3e3c6/download) / [Swahili](https://cgspace.cgiar.org/bitstreams/0231adad-16e3-4bae-af0f-2656c66066b7/download))
  - MoreMilk poster/sticker mama cooking ([English](https://hdl.handle.net/10568/140647) / [Swahili](https://hdl.handle.net/10568/140651))
  - MoreMilk poster/sticker vendor shop ([English](https://hdl.handle.net/10568/140637) / [Swahili](https://hdl.handle.net/10568/140642))

## Laboratory protocols

### 2.1. Aerobic Bacterial Count Standard Operating Procedure

#### 2.1.1. PURPOSE/APPLICABILITY

**Purpose**

3M Petrifilm AC Plates are used for the enumeration of aerobic bacteria in the food and beverage industries. 3M Petrifilm AC Plate components are decontaminated though not sterilized. For further details, see [Neogen® (previously 3M™) Petrifilm](https://www.neogen.com/categories/microbiology/petrifilm-aerobic-count-plates/?min=700002116) Aerobic Count.

**3M Petrifilm**

The 3M™ Petrifilm™ Aerobic Count (AC) Plate is a sample-ready-culture medium system which contains modified Standard Methods nutrients, a cold-water-soluble gelling agent, and a tetrazolium indicator that facilitates colony enumeration.

#### 2.1.2. STORAGE OF MATERIALS

Store unopened pouches of 3M™ Petrifilm™ plates refrigerated or frozen at temperatures lower than or equal to 8°C (46°F).

Avoid exposure of plates to temperatures >25°C (>77°F) and/or relative humidity >50%.

**2.1.3. EQUIPMENT AND MATERIALS**

| Equipment | Reagents and Materials | |
| --- | --- | --- |
| Incubators set at 30⁰C | Distilled water | Calibrated pipettes (p100-1000) |
| Freezer -20⁰C | Sterile Buffered peptone water | 70% ethanol |
| Fridge +4⁰C | 1 liter sterile glass bottles | Sterile serological pipettes 10ml |
| Colony counter | Sterile spreaders | Gloves |
| Biosafety cabinet | 3M Petrifilm Aerobic count plates | Paper towels |
| Thermometer | Sterile 15ml test tubes with screw caps | Test tube holders |
| Vortex mixer machine | Pipette tips (1ml) | Biohazard waste bags |
|  | Spray bottles for sanitizer | Adhesive masking tape |
|  | Aluminium foil | Fine-point marker pen |
|  | Autoclave tape |  |

**2.1.4. PROCEDURE**

**Media preparation**

Buffered peptone water (BPW)

- Weigh 20g of buffered peptone premix powder into a 1 liter glass bottle
- Add 1 liter of distilled water, mix well until the powder is completely dissolved
- Aliquot the medium in quantities of 9ml into test tubes and cap them
- Autoclave at 121⁰C for 15 minutes
- After cooling, store at 4⁰C refrigerator for no longer than 3 months

3M petrifilm plates

- Before use, allow unopened pouches to come to room temperature, if the pouch was already opened and stored at room temperature, use the plates immediately
- Remove the appropriate number of plates required for immediate analysis and return the remainder back to the pouch
- Seal the pouch by folding the end of the pouch over and applying adhesive tape
- Store resealed pouches in a cool, dry place for no longer than four weeks

**Preparation of initial suspensions and dilutions**

- Before use, allow the sample from the fridge to come to room temperature (this may take about 45 mins)
- Homogenize the sample by vortexing for one minute (ensure the cup of the tube is tightly closed to avoid spills)
- Prepare 6 dilutions per sample as follows:
  - Prepare 6 pre-prepared BPW tubes per sample. Allow them to come to reach room temperature (this may take about 45 minutes)
  - label the tubes according to the dilution they will contain (-1, -2...-6)
  - Transfer 1ml of the sample to the first tube (labelled -1) containing 9ml buffered peptone water and vortex.
  - Make subsequent serial dilutions by transferring 1ml of the previous dilution into the next BPW tube.
  - CAUTION: always vortex the dilutions before pipetting out. Always use a new pipette tip between dilutions.
- Return the sample back to the fridge (+4C) until results are successfully read (for that particular sample). After that, store the sample in the freezer (-20C) until end of the project.

**Sample inoculation**

- This work is to be done in a biosafety cabinet
- Label the petrifilm plates at the top margin with the unique sample ID(RCT######) and the sample test or the number of dilutions to be plated (each dilution should be plated in duplicate)
- Place one 3M petrifilm AC plate on a flat, level surface
- Lift the top film and dispense 1 ml of the sample suspension onto the center of bottom film
- Drop the top film down onto the sample
- Place the 3M petrifilm spreader (provided) with the indented side down on the center of the plate
- Press the spreader gently on the center of the spreader to distribute the diluent evenly over the entire growth area before the gel is formed. Do not slide the 3M Petrifilm Spreader across the film.
- Remove the spreader and leave the plate undisturbed for one minute to allow the gel to form
- Plate following the instructions above the test sample and the six dilutions prepared

**Incubation of plates**

- Incubate at 30⁰C ±1⁰C for 72 ± 3hrs (equivalent to 3 days)
- Incubate plates with clear side up in stacks of up to 20

**Colony counting**

- Aerobic bacterial colonies look red in the 3M Petrifilm. For further reference, please see [Neogen® Petrifilm® Aerobic Count Plate interpretation guide](https://media.neogen.com/m/7a03e221597d2cd2).
- In every plate count any colonies that match the morphological description in the guide above
- You should only count plates that contain less than or equal to 300 colonies.
- Plates that contain more than 300 colonies should be recorded as TNTC (Too Numerous to Count)

**Recording of daily activities and lab results**

- LABORATORY BOOK - Record daily on the project lab book (provided) the laboratory activities, being very specific.
- List the sample IDs processed, the activities performed, results (when relevant) and any challenges encountered every day.
- Include any information that can be helpful when interpreting the results (colonies stored in the freezer, list of plate IDs with the dates they were removed from incubator). This should also include the name of the person/s that conducted the laboratory analysis.
- The person that has written the information in the lab book should sign the book every day when information is recorded.
- ELECTRONIC DATABASE - Record daily the laboratory results in the excel sheet provided. To do this, refer to Annex 1.2 at the end of the document.
- Record in the excel sheet provided (sheet named Aerobic count-raw data) the sample code with all the digits indicated on the sample received e.g., RCT000001, date of sample reception in the laboratory, date of analysis, date of results (after the incubation period). For date entry, key in (month/day/year “month/dd/yyyy”) to be displayed in excel as “dd-month-yyyy”
- For each dilution and each plate (A and B) record the colony count for as many dilutions as it was possible to count (i.e., plates having ≤300 colonies). For plates with >300 colonies, record TNTC.

**Additional notes**

- Store the plated dilutions at +4⁰C (fridge) until all the plates are counted.
- If the colonies are too many to be counted in dilution 10^-6, make three more dilutions using the last dilution (-6) kept in the fridge (should be kept at room temperature before use) and plate them according to protocol.
- Plates should be removed from the incubator 72 ± 3hrs from the time they were placed in the incubator. If the 3M petrifilm plates cannot be counted within 1 hour of removal, they may be stored for later enumeration by freezing the plates inside a sealable container/sealed in aluminium foil at temperature -20⁰C. The plates can then be counted within 1 week from storage, but no after that. Ensure the plates are counted within 1 week from being stored.

**2.1.5. REFERENCES**

1. ISO 4833 Microbiology of food and animal feeding stuffs – Horizontal method for the enumeration of microorganisms – Colony-count technique at 30°C.
2. 3M petrifilm aerobic count plate product instructions manual
3. ISO 7218. Microbiology of food and animal feeding stuffs – General requirements and guidance for microbiological examinations.

### 2.2. Enterobacteriaceae Count Standard Operating Procedure

**2.2.1. PURPOSE/APPLICABILITY**

**Purpose**

3M Petrifilm EB Plates are used for the enumeration of Enterobacteriaceae in the food, beverage, and bottled water industries. For further details, see [Neogen® (formerly 3M™) Petrifilm® Enterobacteriaceae Count Plates](https://www.neogen.com/categories/microbiology/petrifilm-enterobacteriaceae-count-plates/).

**3M Enterobacteriacea petrifilm**

The 3M™ Petrifilm™ Enterobacteriaceae Count (EB) Plate is a sample-ready-culture medium system which contains modified Violet Red Bile Glucose (VRBG) nutrients, a cold-water-soluble gelling agent, and a tetrazolium indicator that facilitates colony enumeration. Enterobacteriaceae are oxidase-negative, Gram-negative rods that ferment glucose to produce acid and/or gas. On 3M Petrifilm EB Plates, Enterobacteriaceae will appear as red colonies with yellow zones, red colonies with gas bubbles, or red colonies with yellow zones and gas bubbles.

**2.2.2. STORAGE OF MATERIALS**

Store unopened pouches of plates refrigerated or frozen at temperatures lower than or equal to 8°C (46°F).

Avoid exposure of plates to temperatures >25°C (>77°F) and/or relative humidity >50%.

**2.2.3. EQUIPMENT AND MATERIALS**

| Equipment | Reagents and Materials | |
| --- | --- | --- |
| Incubators set at 37⁰C | Distilled water | Gloves |
| Fridge -20⁰C,4⁰C | Sterile Buffered peptone water | Paper towels |
| Colony counter | 1 liter sterile glass bottles | Test tube holders |
| Biosafety cabinet | Sterile spreaders | Biohazard waste bags |
| Thermometer | 3M Petrifilm Enterobacteriaceae count plates | Spray bottles for sanitizer |
| Vortex machine | Sterile 15ml test tubes with screw caps | Aluminium foil |
|  | Pipette tips (1ml) | Autoclave tape |
|  | Calibrated pipettes (p100-1000) | Adhesive masking tape |
|  | 70% ethanol | Fine-point marker pen |
|  | Sterile serological pipettes 5ml,10ml |  |

**2.2.4. PROCEDURE**

**Media preparation**

Buffered peptone water (BPW)

- Weigh 20g of buffered peptone premix powder into a 1 liter glass bottle
- Add 1 liter of distilled water, mix well until the powder is completely dissolved
- Aliquot the medium in quantities of 9ml into test tubes and cap them
- Autoclave at 121⁰C for 15 minutes
- After cooling, store at 4⁰C refrigerator for no longer than 3 months

3M petrifilm plates

- Before use, allow unopened pouches to come to room temperature, if the pouch was already opened and stored at room temperature, use the plates immediately
- Remove the appropriate number of plates required for immediate analysis and return the remainder back to the pouch
- Seal the pouch by folding the end of the pouch over and applying adhesive tape
- Store resealed pouches in a cool, dry place for no longer than four weeks

**Preparation of initial suspensions and dilutions**

- Before use, allow the sample from the fridge to come to room temperature (this may take about 45 mins)
- Homogenize the sample by vortexing for one minute (ensure the cup of the tube is tightly closed to avoid spills)
- Prepare 6 dilutions per sample as follows:
  - Prepare 6 pre-prepared BPW tubes per sample. Allow them to come to reach room temperature (this may take about 45 minutes)
  - label the tubes according to the dilution they will contain (-1, -2...-6)
  - Transfer 1ml of the sample to the first tube (labelled -1) containing 9ml buffered peptone water and vortex.
  - Make subsequent serial dilutions by transferring 1ml of the previous dilution into the next BPW tube.
  - CAUTION: always vortex the dilutions before pipetting out. Always use a new pipette tip between dilutions.
- Return the sample back to the fridge (+4C) until results are successfully read (for that particular sample). After that, store the sample in the freezer (-20C) until end of the project

**Sample inoculation**

- This work is to be done in a biosafety cabinet
- Label the petrifilm plates at the top margin with the unique sample ID(RCT######) and the sample test or the number of dilutions to be plated (each dilution should be plated in duplicate)
- Place one 3M petrifilm EB plate on a flat, level surface
- Lift the top film and dispense 1 ml of the sample suspension onto the center of bottom film
- Roll the top film down onto the sample to prevent trapping air bubbles
- Place the 3M petrifilm spreader (provided) with the flat side down on the center of the plate Press the spreader gently on the center of the spreader to distribute the diluent evenly over the entire growth area before the gel is formed. Do not slide the 3M Petrifilm Spreader across the film.
- Remove the spreader and leave the plate undisturbed for one minute to allow the gel to form
- Plate following the instructions above the test sample and the six dilutions prepared

**Incubation**

- Incubate at 37⁰C for 24 ± 2hrs (equivalent to 1 day)
- Incubate plates with clear side up in stacks of up to 20

**Colony counting**

- Enterobacteriacea bacterial colonies are either red colonies associated with yellow zones, red colonies associated with gas bubbles or red colonies associated with yellow zones and with gas bubbles. For more details consult Neogen® Petrifilm® Enterobacteriaceae Count Plates [Interpretation Guide](https://media.neogen.com/m/288792d8b4176ddc/).
- In every plate count any colonies that match the morphological descriptions in the guide above
- You should only count plates that contain less than or equal to 100 colonies.
- Plates that contain more than 100 colonies should be recorded as TNTC (Too Numerous to Count)

**Recording to lab results**

LABORATOY BOOK - Record daily on the project lab book (provided) the laboratory activities, being very specific. List the sample IDs processed, the activities performed, results (when relevant) and any challenges encountered every day. Include any information that can be helpful when interpreting the results. This should also include the name of the person/s that conducted the laboratory analysis. The person that has written the information in the lab book should sign the book every day when information is recorded.

ELECTRONIC DATABASE - Record daily the laboratory results in the excel sheet provided. To do this, refer to Annex 1.2 at the end of the document.

- Record in the excel sheet provided (sheet named Aerobic count-raw data) the sample code with all the digits indicated on the sample received e.g., RCT000001, date of sample reception in the laboratory, date of analysis, date of results (after the incubation period). For date entry, key in (month/day/year “month/dd/yyyy”) to be displayed in excel as “dd-month-yyyy”.
- For each dilution and each plate (A and B) record the colony count for as many dilutions as it was possible to count (i.e., plates having ≤100 colonies). For plates with >100 colonies, record TNTC.

**Additional notes**

- Store the plated dilutions at +4⁰C (fridge) until all the plates are counted.
- If the colonies are too many to be counted in dilution 10^-6, make three more dilutions using the last dilution (-6) kept in the fridge (should be kept at room temperature before use) and plate them according to protocol.
- Plates should be removed from the incubator 24 ± 2hrs from the time they were placed in the incubator. If the 3M petrifilm plates cannot be counted within 1 hour of removal, they may be stored for later enumeration by freezing the plates inside a sealable container/sealed in aluminium foil at temperature -20⁰C. The plates can then be counted within 1 week from storage, but no after that. Ensure the plates are counted within 1 week from being stored.

**2.2.5. REFERENCES**

1. ISO 7218. Microbiology of food and animal feeding stuffs – General rules for microbiological examination
2. ISO 21528-2. Microbiology of food and animal feeding stuffs – Horizontal methods for the detection and enumeration of Enterobacteriaceae – Part 2: colony count method
3. 3M petrifilm Enterobacteriacea count plate product instructions manual

## Dietary intake estimation

### 3.1. Assessment

Dietary intake of the index child was assessed using the multiple-pass 24-hour recall method.2 Data were collected using CAPI program coded by the study researchers using Survey Solutions.

Enumerators were trained extensively with a strong focus on proper interview technique, adequate probing, proper use of tools for portion size estimation, and correct recording in the CAPI program. Readiness of enumerators was evaluated through a pilot survey, one-on-one sessions with supervisors, and through written exams.

A random sample of ~15% of primary caregivers was interviewed a second day to allow for the estimation of usual intake.2 Second-day interviews were carried out on a different day of the week by a different enumerator around 2 weeks after the first recall.

Portion sizes of foods consumed were estimated with direct weights of food of similar size and nature when possible or with food models (beans, salted ugali, water), common unit sizes (facilitated by a photobook prepared by Kenya Medical Research Institute (KEMRI)), linear dimensions (cm), or modelling clay. Standard recipes were created for a small set of commonly consumed mixed dishes (none of them containing milk) to ease the data collection process. For non-standard mixed home-cooked dishes, the interviewer collected details on the recipe. This included the amounts and types of ingredients, cooking method, and the total amount of the prepared dish.

### 3.2. Conversion to nutrient intake

We applied conversion factors to convert food models to weight in grams. Conversion factors were collected previously by a local team for the MilkMarkets study conducted in peri-urban Nairobi. For mixed dishes, the amount of each ingredient consumed was estimated using the following formula:

Approximately 3% of non-standard mixed dishes, which represented less than <1% of all dishes listed in the first pass of the dietary recall, were missing recipe information. Missingness was primarily due to dishes not being prepared by the child’s caregiver. To address this problem, we identified all similar recipes in the data set and randomly selected one to fill in missing information.

The amount consumed was missing for around 3% and 5% of foods at baseline and endline, often for foods consumed at daycare or school. We imputed these missing amounts by taking the median volume of similar items consumed based on type of food (e.g., beverage, stew, scrambled eggs, ugali, porridge), the main ingredient of the recipe (e.g., to distinguish rice- from potato-based mixed dishes or hot chocolate from fruit juice beverages), meal time, and the child’s age group. If there weren't at least 25 observations to inform the imputation, then we used a broader set of foods and beverages by relaxing these criteria in the following order: meal time, the main ingredient of the recipe, and the child's age group.

We used food composition data from the Kenya Food Composition Tables 20183 and complemented, where needed, with food composition data from the Tanzania FCT4, the Harvestplus FCT compiled for Uganda5, the USDA Food Data Central6, and from product labels for a subset of commercially processed foods. In line with Kenya legislation, vegetable oil in our study area was fortified with vitamin A. The vitamin A content in oil used in the analyses was based on product labels, i.e., 2mg/kg was used as 2000 mcg RAE per 100 gram oil. Nutrient retention factors were applied to the ingredients to account for the nutrient loss due to cooking.7 For vitamin A (RAE) in fortified oil, we applied a retention factor of 90%.8

### 3.3. Data cleaning

For children with extreme energy intakes, we reviewed the full list of foods and consumption estimates and resolved obvious data entry errors. For several non-standard recipes, particularly the solid, starch-based recipes, we detected unreasonably high intakes. Upon careful inspection, we determined that in most of these cases, the total volume of the prepared recipe was underestimated resulting in very high intakes of ingredient components. To correct for this error, we re-estimated the total volume of the prepared recipe using yield factors of primary ingredients3 and known densities of cooked foods.9 Changes affected 17% of unique recipes and 4% of total foods consumed at baseline; and 16% of unique recipes and 4% of total foods consumed at endline.

### 3.4. Breastmilk intake

The proportion of children being breastfed was 27% and 3% at baseline and endline. Breastmilk intake was not measured directly. We used age-specific intake values from a recent meta-regression on breastmilk intakes among children up to 2y of age.10 For children older than 2 years of age, we applied a 15% reduction in intake per month, based on the calculated reduction in breastmilk intake between 23 and 24 months in the meta-regression.10

### 3.5. Usual intake estimation

We estimated the usual intake of each nutrient by applying a measurement error model.11 Briefly, we first transformed the observed nutrient intakes using a Box-Cox transformation. We estimated the within-person variance (using the subsample of children with a second recall day) and the between-person variance on the full sample, and then calculated the best-linear unbiased predictor of usual nutrient intake using the ratio of these variances.

We assessed the influence of outliers on the usual intake distribution by evaluating if the within-to-between variance ratios were greater than ten.12 None of the variance ratios were above this benchmark, and thus all data points were retained.

We further checked if the imputed values for missing consumption estimates of single foods or beverages impacted the estimates of usual intakes and probabilities of inadequacies, and no differences between the full sample with imputations and the subsample with complete data were detected.

### 3.6. Requirements and requirement distributions

We used the recently published harmonized nutrient reference values.13 For iron, we used EFSA’s physiological requirement14 as recommended by Allen et al. 13, and recreated the known skewed distribution as published by the IOM15.The population reference intake (PRI) for protein was based on the child’s body weight. Since we did not measure child weight, PRI’s for protein were based on the median weight for a child’s age and sex from the WHO growth standard.16

### 3.7. Construction of primary and secondary nutrition outcome variables

**Mean adequacy ratio (MAR) of calcium, protein and vitamin B12** -We defined the mean adequacy ratio (MAR) as the arithmetic mean of the nutrient adequacy ratios (NAR) for calcium, protein and vitamin B12. The NAR is the ratio of the observed nutrient intake to the age- and sex-specific nutrient requirement. The NAR was not capped at 100%. Since MAR had a right-tailed skewed distribution, we used the natural logarithm to achieve an approximately normal distribution. All analyses were conducted using the transformed variable.

**Milk intake –** We summed the gram intake of all liquid milk consumed on the first recall day. Milk intake exhibited a skewed distribution. We set milk intake to .001 grams for the 5% of non-consumers and performed a box cox transformation to achieve an approximately normal distribution of intakes. Impact was assessed for both the untransformed and transformed outcomes. The findings were not substantively different.

**Probability of adequacy of iron, zinc, and vitamin A** – We used the probability approach to estimate the probability of adequacy of iron, zinc, and vitamin A.17 For each nutrient, we transformed the requirement distribution using the lambda used in the Box-Cox transformation of the intake (see above). We subsequently estimated the probability of adequacy.

**Mean probability of adequacy** - The mean probability of adequacy was derived by taking the arithmetic mean of the estimated probabilities of nutrient adequacy for 10 micronutrients – vitamin A, vitamin C, niacin, riboflavin, thiamin, folate, B12, calcium, iron, and zinc. Whereas vitamin B6 is often included in the definition of MPA, we could not include it as it is not a nutrient listed in the Kenya FCT.

### 3.8. Sensitivity analyses

24hr recalls are subject to reporting errors, with both under and overreporting of intake potentially biasing results or leading to imprecise estimates. We tested the sensitivity of our impact findings to reporting errors by removing likely under- and over-reporters from the analyses. We use adaptations to Goldberg’s18,19 cut-off method (1991) to identify likely under-reporters.20 We divided energy intake by the estimated age- and sex-specific basal metabolic rate. Underreporting for boys was defined as ratio below 0.74 and for girls as a ratio below 0.78.20 Overreporting was defined as a ratio above 3.0.21 Re-estimating the impact without these outliers did not substantively change the impact finding.

## Computation of covariates

### 4.2. Per adult equivalent dairy expenditures

Household dairy expenditure was calculated from data on household dairy consumption and expenditure in the past 7 days. Missing observations for quantity (n=3) and unit (n=6) were imputed using the county-specific mode of quantity and unit. Total dairy expenditure was calculated by multiplying the quantity purchased by the unit cost of each dairy product and summing over all dairy products.

To account for differences in household size and composition, dairy expenditure was calculated per adult equivalent (AE). AE was calculated by dividing each household member’s age- and sex-specific recommended daily energy intake by the mean recommended intake of a 30 to 60-year-old male, 65 kg in weight with a moderate amount of physical activity (3000 kcal or 12,552 kJ/d).22 Missing values for age (n=21 individuals at baseline) were imputed by substituting the median age of individuals with the same relation to household head. For one individual (grandmother of the head of household) we did not have enough observations to impute age using this approach. Instead, we took the top quintile of the age distribution and used the median age in this quintile.

For women who were biological mothers of a child under 12 mo of age, we added 567 kilocalories to their energy requirement, i.e. the mean of the added requirements for exclusive and partial breastfeeding.22 We adjusted the adult equivalent for the proportion of days an individual ate or slept in the household in the past week. The number of AE for each household was computed as the sum of the individual AEs.

### 4.3. Household wealth

We used variables on house ownership, dwelling characteristics, household services, and household assets to construct the wealth index. Categorical variables were collapsed to binary variables; and all were recoded to reflect 1=wealthy and 0=poorer. Variables were then inspected to ensure adequate variation within the population (at least 5% of the population in any given category) and correlation with other variables (rho > 0.1 and <0.9). We ran a principle component analysis, inspected component loadings of the first principal component and the Kaiser-Meyer-Olkin Measure of Sampling.

The final score was based on the following wealth characteristics: house ownership, number of distinct rooms (two or more), material of walls (stone, cement, brick, landrete, metal, slate, asbestos), material of floors (cement, sandcrete, ceramic, tile), usual toilet facility is not shared other households, usual toilet facility is flush or ventilated improved pit latrine, household has a kitchen inside the house, main light source (solar energy or battery operated equipment), household treats their drinking water, main cooking fuel (electricity, gas, biogas, charcoal), and household owns a refrigerator.

### 4.4. Household food insecurity

The Household Food Insecurity Access Scale was used to categorize households as food secure or food insecure.23

## Lee bounds

To evaluate the effect of differential attrition on the treatment effect, we estimated Lee bounds.24 This approach creates upper and lower bounds of the treatment effect by estimating the impact of the intervention on a subset of the observations. This subset is created by trimming the upper (and lower) tail of the distribution of the outcome variable in the arm with less attrition. The models are run on the resulting trimmed datasets, producing estimates of the average treatment effect had differential attrition not occurred. Lee bounds were estimated as follows:

- We computed the proportions of non-missing observations remaining at endline in the treatment and control group for each outcome. The group with the greater share at endline was the group to be trimmed. For our dietary outcomes, the proportion of observations remaining at endline in the treatment and control groups, respectively, were 0.7957 and 0.7847. In the case of vendor TBC and Enterobacteriaceae outcomes, the proportion of observations at endline in the treatment and control groups, respectively, were 0.8409 and 0.7385; In the case of vendor business sales, cost and profits outcomes, the proportion of observations remaining at endline in the treatment and control groups, respectively, were 0.8265 and 0.7865 (for profits), 0.84 and 0.7647 (for sales), and 0.8322 and 0.7571 (for costs); thus the treatment group was trimmed in all cases.
- We calculated the excess proportion in the treatment group that needed to be trimmed dividing the absolute difference in the proportions remaining at endline by the proportion in the group to be trimmed. For the dietary outcomes, this was (0.7957-0.7847)/0.7957 = 0.0139; for the food safety outcomes it was (0.8409-0.7385)/ 0.8409 = 0.134; for the business outcomes it was (0.8265-0.7865)/0.8265=0.0484 (for profits), (0.84-0.7647)/0.84=0.0896 (for sales), and (0.8322-0.7571)/0.8322=0.0902 (for costs).To obtain the lower bound, we trimmed the upper tail of the outcome distribution in the treatment group and ran the mixed model to obtain betas and standard errors. The same strategy was followed to obtain the upper bound after trimming the lower tail of the outcome distribution.

## Lee bound results

## 6.1. Attrition

**Table S6.1a. Baseline vendor characteristics of non-attritors and attritors**

|  | **All** | | | | **Treatment** | | | | **Control** | | | |
| --- | --- | --- | --- | --- | --- | --- | --- | --- | --- | --- | --- | --- |
|  | **Non-attritors** | | **Attritors** | | **Non-attritors** | | **Attritors** | | **Non-attritors** | | **Attritors** | |
|  | **% or**  **mean ± SD** | **Median (IQR)** | **% or**  **mean ± SD** | **Median (IQR)** | **% or**  **mean ± SD** | **Median (IQR)** | **% or**  **mean ± SD** | **Median (IQR)** | **% or**  **mean ± SD** | **Median (IQR)** | **% or**  **mean ± SD** | **Median (IQR)** |
| Descriptives |  |  |  |  |  |  |  |  |  |  |  |  |
| **N**¥ | 225 | | 58 | | 119 | | 24 | | 106 | | 34 | |
| Business type |  |  |  |  |  |  |  |  |  |  |  |  |
| Shop/kiosk, % | 86.7 |  | 84.5 |  | 83.2 |  | 83.3 |  | 90.6 |  | 85.3 |  |
| Milk bar, % | 12.4 |  | 15.5 |  | 15.1 |  | 16.7 |  | 9.4 |  | 14.7 |  |
| Street vendor, % | 0.9 |  | 0 |  | 1.7 |  | 0 |  | 0 |  | 0 |  |
| Business ownership |  |  |  |  |  |  |  |  |  |  |  |  |
| Single owner, % | 92.4 |  | 94.8 |  | 95.0 |  | 100.0 |  | 89.6 |  | 91.2 |  |
| Multiple owners, % | 7.6 |  | 5.2 |  | 5.0 |  | 0 |  | 10.4 |  | 8.8 |  |
| Business land |  |  |  |  |  |  |  |  |  |  |  |  |
| Own property | 18.2 |  | 6.9 |  | 17.6 |  | 8.3 |  | 18.9 |  | 5.9 |  |
| Rented | 80.4 |  | 91.4 |  | 79.8 |  | 87.5 |  | 81.1 |  | 94.1 |  |
| Used for Free | 1.3 |  | 1.7 |  | 2.5 |  | 4.2 |  | 0 |  | 0 |  |
| Gender of respondent |  |  |  |  |  |  |  |  |  |  |  |  |
| Female, % | 71.6 |  | 65.5 |  | 71.4 |  | 62.5 |  | 71.7 |  | 67.6 |  |
| Business age, months | 41.1±46.8 | 26.0 (11.1, 56.8) | 38.1±55.1 | 14.4 (7.1, 48.0) | 40.1±41.1 | 26.2 (12.1, 57.8) | 35.9±56.3 | 13.38 (3, 51.8) | 42.3±52.8 | 23.74 (10.0, 53.4) | 39.7±55.1 | 14.9 (8.2, 48.0) |
| Daily customers (milk) | 68.1±190.9 | 20 (10, 34.5) | 23.3±39.9 | 15 (10,25) | 96.7±246.3 | 20 (10, 50) | 17.9±12.4 | 15 (9, 22.5) | 34.2±76.9 | 15 (10, 30) | 27.5±52.1 | 15 (10, 25) |
| Type of customers |  |  |  |  |  |  |  |  |  |  |  |  |
| Individuals, % | 100.0 |  | 100.0 |  | 100.0 |  | 100.0 |  | 100.0 |  | 100.0 |  |
| Hotels/restaurants, % | 13.8 |  | 6.9 |  | 16.0 |  | 8.3 |  | 11.3 |  | 5.9 |  |
| Unpacked milk sold, L/week | 178.9±331.8 | 105 (70, 175) | 109.7±106.4 | 70 (56, 140) | 213.4±440.5 | 111 (70, 175) | 121.1±142.7 | 70 (46, 130) | 140.0±117.3 | 105 (70, 177.5) | 101.3±70.8 | 70 (60, 140) |
| Packed pasteurized milk sold, L/week¥¥ | 15.1±15.8* | 10.5 (6, 20.4)* | 11.5±8.2 | 10.5 (3, 18) | 16.6±15.7** | 12 (6, 22.2) ** | 6.8±6.1 | 5 (3, 8.25) | 13.5±16.0** | 8 (5,15) ** | 15.6±7.9 | 18 (10.5, 24) |
| Outcomes |  |  |  |  |  |  |  |  |  |  |  |  |
| N | 218 | | 44 | | 114 | | 18 | | 104 | | 26 | |
| Total Bacterial Count (Ln(cfu)/ml) | 13.4±6.2 |  | 14.8±7.1 |  | 13.9±6.0 |  | 13.4±7.7 |  | 12.8±6.5 |  | 15.7±6.7 |  |
| Enterobacteriaceae count (Lncfu/ml) | 11.1±6.7 |  | 13.1±8.3 |  | 11.5±6.9 |  | 11.3±8.9 |  | 10.6±6.6 |  | 14.3±7.9 |  |
| Monthly profits (Ksh)¥¥ | 8,086.5±9,888.0 |  | 7,450.0±9509.8 |  | 9,465.4±11,093.0 |  | 6,482.4±10,896.3 |  | 6,490.9±8,066.0 |  | 8,315.8±8,284.5 |  |
| Monthly sales (Ksh)¥¥ | 71,076.9±67,150.7 |  | 61,195.0±60,872.2 |  | 73,381.9±69,352.8 |  | 58,475.0±55,309.1 |  | 68,098.2±64,605.4 |  | 63,371.0±66,328.7 |  |
| Monthly costs (Ksh) | 52,091.8±50,389.0 |  | 38,619.7±42,073.1 |  | 56,583.2±52,452.6 |  | 44,483.8±42,434.0 |  | 47,049.5±47,709.5 |  | 34,480.4±41,950.7 |  |

¥ There is a maximum difference of n=7 across variables; ¥¥ N value for this variable is smaller than presented in the table; *calculated removing two outlier observations; **calculated removing one outlier observation.

**Table S6.1b. Baseline household characteristics of non-attritors and attritors**

|  | **All** | | | | **Treatment** | | | | **Control** | | | | | |
| --- | --- | --- | --- | --- | --- | --- | --- | --- | --- | --- | --- | --- | --- | --- |
|  | **Non-attritors** | | **Attritors** | | **Non-attritors** | | **Attritors** | | **Non-attritors** | | | **Attritors** | | |
|  | **% or**  **mean ± SD** | **Median (IQR)** | **% or**  **mean ± SD** | **Median (IQR)** | **% or**  **mean ± SD** | **Median (IQR)** | **% or**  **mean ± SD** | **Median (IQR)** | **% or**  **mean ± SD** | **Median (IQR)** | **% or mean ± SD** | | **Median (IQR)** |
| N¥ | 753 | | 201 | | 374 | | 97 | | 379 | | | 104 | | |
| Descriptives |  |  |  |  |  |  |  |  |  |  |  | |  |
| Household size | 4.5±1.5 | 4.0 (3.0-5.0) | 4.1±1.4 | 4.0 (3.0-5.0) | 4.5±1.5 | 4.0 (3.0-5.0) | 4.1±1.2 | 4.0 (3.0-5.0) | 4.5±1.6 | 4.0 (3.0-5.0) | 4.2±1.6 | | 4.0 (3.0-5.0) |
| Head of household education |  |  |  |  |  |  |  |  |  |  |  | |  |
| Primary incomplete, % | 10.1 |  | 10.4 |  | 7.5 |  | 8.2 |  | 12.7 |  | 12.5 | |  |
| Some secondary, % | 30.5 |  | 29.9 |  | 28.6 |  | 29.9 |  | 32.5 |  | 29.8 | |  |
| Secondary complete, (some) higher, % | 59.4 |  | 59.7 |  | 63.9 |  | 61.9 |  | 54.9 |  | 57.7 | |  |
| Food secure, % | 21.1 |  | 23.9 |  | 22.7 |  | 27.8 |  | 19.5 |  | 20.2 | |  |
| Monthly per AE dairy expenditure, KSH | 915±655 | 759 (510-1134) | 953±873 | 752 (482-1209) | 951±673 | 814 (555-1160) | 1011±1082 | 817 (473-1212) | 879±635 | 717 (482-1104) | 898±619 | | 730 (491-1178) |
| Wealth score | 0.0±1.5 | -0.5 (-1.0-0.6) | -0.2±1.3 | -0.5 (-1.0-0.1) | 0.0±1.5 | -0.4 (-1.0-0.5) | -0.3±1.2 | -0.5 (-1.0--0.1) | 0.1±1.6 | -0.5 (-1.0-0.6) | 0.0±1.5 | | -0.5 (-1.0-0.5) |
| Child age, months | 28.2±10.4 | 27.4 (19.0-37.0) | 26.8±10.0 | 26.1 (18.6-34.8) | 28.1±10.3 | 27.2 (19.6-36.8) | 26.4±9.7 | 26.8 (18.2-33.3) | 28.3±10.5 | 27.7 (18.3-37.0) | 27.1±10.3 | | 24.6 (18.6-36.2) |
| Child sex – boy, % | 49.0 |  | 54.2 |  | 49.5 |  | 50.5 |  | 48.5 |  | 57.7 | |  |
| Outcomes |  |  |  |  |  |  |  |  |  |  |  | |  |
| Mean adequacy ratio (MAR) of protein, Ca, and vitamin B12 | 3.1±2.1 | 2.5 (1.7-3.9) | 3.0±2.1 | 2.5 (1.6-3.7) | 3.1±2.1 | 2.5 (1.8-3.9) | 3.1±2.4 | 2.4 (1.6-3.6) | 3.1±2.1 | 2.6 (1.6-4.0) | 2.9±1.8 | | 2.5 (1.6-3.7) |
| ln(MAR protein, Ca, and vitamin B12) | 0.9±0.6 | 0.9 (0.6-1.4) | 0.9±0.6 | 0.9 (0.5-1.3) | 0.9±0.6 | 0.9 (0.6-1.4) | 0.9±0.6 | 0.9 (0.5-1.3) | 0.9±0.6 | 0.9 (0.5-1.4) | 0.9±0.6 | | 0.9 (0.5-1.3) |
| Milk intake past 24h, ml | 317±242 | 266 (147-432) | 287±200 | 243 (138-405) | 317±215 | 288 (159-428) | 279±197 | 234 (137-378) | 317±266 | 261 (135-437) | 294±203 | | 249 (146-419) |
| Milk intake past 24h, ml (Box Cox) | 32.8±15.2 | 32.6 (23.5-42.3) | 31.2±14.2 | 31.0 (22.6-40.9) | 33.2±14.2 | 34.0 (24.5-42.1) | 30.6±14.3 | 30.3 (22.5-39.4) | 32.5±16.1 | 32.2 (22.3-42.6) | 31.7±14.1 | | 31.4 (23.4-41.7) |
| Mean probability of adequacy (MPA) | 0.82±0.15 | 0.87 (0.74-0.94) | 0.82±0.14 | 0.85 (0.73-0.93) | 0.83±0.14 | 0.87 (0.75-0.94) | 0.82±0.14 | 0.82 (0.72-0.94) | 0.82±0.16 | 0.87 (0.73-0.94) | 0.82±0.14 | | 0.86 (0.73-0.93) |
| Probability of adequacy vitamin A | 0.98±0.11 | 1.00 (1.00-1.00) | 0.98±0.13 | 1.00 (1.00-1.00) | 0.98±0.10 | 1.00 (1.00-1.00) | 0.98±0.09 | 1.00 (1.00-1.00) | 0.98±0.12 | 1.00 (1.00-1.00) | 0.97±0.16 | | 1.00 (1.00-1.00) |
| Probability of adequacy zinc | 0.91±0.24 | 1.00 (1.00-1.00) | 0.93±0.21 | 1.00 (1.00-1.00) | 0.93±0.22 | 1.00 (1.00-1.00) | 0.92±0.21 | 1.00 (0.99-1.00) | 0.90±0.27 | 1.00 (1.00-1.00) | 0.94±0.20 | | 1.00 (1.00-1.00) |
| Probability of adequacy iron | 0.38±0.24 | 0.35 (0.15-0.55) | 0.35±0.23 | 0.25 (0.15-0.55) | 0.38±0.24 | 0.35 (0.15-0.55) | 0.35±0.23 | 0.25 (0.15-0.55) | 0.37±0.25 | 0.35 (0.15-0.55) | 0.35±0.23 | | 0.30 (0.15-0.55) |
| Child diarrhoea past 7 d, % | 11.2 |  | 15.5 |  | 11.8 |  | 14.4 |  | 10.6 |  | 16.5 | |  |

¥ There is a difference of n=1 across some variables at endline

## Lee bounds

**Table S6.2a** Lee bound estimates for vendor outcomes

|  | **Model 1** | | | **Model 2** | | | **Model 3** | | |
| --- | --- | --- | --- | --- | --- | --- | --- | --- | --- |
|  | **Mixed model** | **Lee bounds** | | **Mixed model** | **Lee bounds** | | **Mixed model** | **Lee bounds** | |
|  | **β ± SE** | **Lower**  **β ± SE** | **Upper**  **β ± SE** | **β ± SE** | **Lower**  **β ± SE** | **Upper**  **β ± SE** | **β ± SE** | **Lower**  **β ± SE** | **Upper**  **β ± SE** |
| **Primary outcome** |  |  |  |  |  |  |  |  |  |
| Ln total bacterial count (12 months) | -0.37 (0.92) | -1.71 (0.95) | 1.28 (0.86) | -0.41 (0.78) | -1.77 (0.74) | 0.75 (0.77) | -0.64 (0.83) | -1.69 (0.77) | 0.57 (0.80) |
| **Secondary food safety outcomes** |  |  |  |  |  |  |  |  |  |
| Ln total bacterial count (4 months) | -1.33 (0.81) | -3.17 (0.79) | 1.02 (0.70) | -1.05 (0.91) | -2.82 (0.89) | 1.23 (0.78) | -1.25 (0.98) | -2.93 (0.96) | 1.05 (0.83) |
| Ln total bacterial count (8 months) | 0.68 (0.84) | -1.34 (0.79) | 2.99 (0.71) | 0.29 (0.86) | -1.72 (0.79) | 2.52 (0.75) | 0.70 (0.91) | -1.15 (0.83) | 2.67 (0.78) |
| Ln total enterobacteria count | -0.08 (0.96) | -1.47 (0.95) | 1.46 (0.92) | 0.05 (0.83) | -1.50 (0.78) | 1.23 (0.81) | -0.12 (0.86) | -1.40 (0.83) | 1.04 (0.83) |
| **Secondary economic outcomes** |  |  |  |  |  |  |  |  |  |
| Monthly profits (Ksh) | 3,464.6  (1,808.3) | 64.1  (1,990.1) | 5,945.7  (2,007.1) | 1,646.8  (1,972.6) | -494.4  (1,782.5) | 3,866.3  (1,835.6) | 1,014.9  (1,972.6) | -361.7  (1,801.4) | 2,593.1  (1,809.4) |
| Monthly sales (Ksh) | 18,840.7 (13,372.8) | -28,300.0  (11,700.2) | 49,443.7  (16,581.5) | 10,162.9  (13,930.8) | -24,900.0  (10,517.3) | 36,472.2  (14,046.1) | 11,116.9  (14,110.6) | -22,000.0  (10,557.9) | 36,425.2  (14,226.7) |
| Monthly costs (Ksh) | 19,028.5  (8,574.4) | 2,346.13  (7,322.5) | 25,907.9  (8,564.7) | 8,637.9  (7,583.3) | -2,010.4  (6,832.8) | 15,444.2  (7,614.1) | 6,473.8  (7,946.1) | -2,954.5  (7,123) | 13,455.8  (7,950.8) |

**Table S6.2b**. Lee bound estimates for child outcomes

|  | **Model 1** | | | **Model 2** | | | **Model 3** | | |
| --- | --- | --- | --- | --- | --- | --- | --- | --- | --- |
|  | **Mixed model** | **Lee bounds** | | **Mixed model** | **Lee bounds** | | **Mixed model** | **Lee bounds** | |
|  | **β ± SE** | **Lower**  **β ± SE** | **Upper**  **β ± SE** | **β ± SE** | **Lower**  **β ± SE** | **Upper**  **β ± SE** | **β ± SE** | **Lower**  **β ± SE** | **Upper**  **β ± SE** |
| **Primary outcome** |  |  |  |  |  |  |  |  |  |
| ln(MAR protein, Ca, and vitamin B12) | 0.09 (0.05) | 0.07 (0.04) | 0.11 (0.04) | 0.07 (0.04) | 0.05 (0.04) | 0.10 (0.04) | 0.06 (0.04) | 0.04 (0.04) | 0.09 (0.04) |
| **Secondary outcomes** |  |  |  |  |  |  |  |  |  |
| Milk intake past 24h, ml | 48 (17) | 35 (16) | 53 (17) | 44 (15) | 32 (15) | 48 (15) | 40 (15) | 27 (14) | 44 (15) |
| Milk intake past 24h, ml (Box cox) | 6.01 (1.90) | 4.96 (1.85) | 6.82 (1.87) | 5.12 (1.68) | 4.22 (1.65) | 5.90 (1.64) | 4.74 (1.64) | 3.81 (1.61) | 5.50 (1.61) |
| Mean probability of adequacy (MPA) | -0.01 (0.01) | -0.01 (0.01) | 0.00 (0.01) | -0.01 (0.01) | -0.01 (0.01) | 0.00 (0.01) | -0.01 (0.01) | -0.01 (0.01) | 0.00 (0.01) |
| Probability of adequacy vitamin A | -0.01 (0.01) | -0.01 (0.01) | 0.00 (0.01) | -0.02 (0.01) | -0.02 (0.01) | 0.00 (0.01) | -0.02 (0.01) | -0.02 (0.01) | 0.00 (0.01) |
| Probability of adequacy zinc | -0.01 (0.02) | -0.01 (0.02) | 0.00 (0.02) | -0.02 (0.02) | -0.02 (0.02) | -0.01 (0.02) | -0.02 (0.02) | -0.03 (0.02) | -0.01 (0.02) |
| Probability of adequacy iron | -0.03 (0.02) | -0.04 (0.02) | -0.03 (0.02) | -0.04 (0.02) | -0.04 (0.02) | -0.03 (0.02) | -0.04 (0.02) | -0.04 (0.02) | -0.03 (0.02) |
| Child diarrhoea past 7 d, % | 0.1 (1.7) | -0.7 (1.7) | 0.1 (1.7) | 0.5 (1.7) | -0.3 (1.6) | 0.5 (1.7) | 0.4 (1.7) | -0.4 (1.6) | - 1. (1.7) |

## Comparison of Total Bacterial counts to East Africa Standards for raw cow milk.

At baseline, the proportion of samples meeting the highest safety standards for raw milk (Grade I) was 5 percentage points lower for vendors in the treatment group, while at endline this proportion was 6 percentage points greater in the treatment than in the control group (table A2.1). At baseline, the treatment and control groups had a similar proportion of samples with total bacterial counts non-compliant with East African Standards for raw milk; at endline, this proportion was 8 percentage points lower in the treatment than in the control group.

**Table S7.1.** Proportion of milk samples from treatment and control groups at baseline and endline meeting the 2006 East African Standards for raw milk.25 It excludes samples of boiled milk.

|  | **Baseline %** | | **Endline %** | |
| --- | --- | --- | --- | --- |
|  | **Control** | **Treatment** | **Control** | **Treatment** |
|  | **n=82** | **n=93** | **n=73** | **n=88** |
| Grade I (<200,000 CFU*/ml) | 29.3 | 24.7 | 19.2 | 25.0 |
| Grade II (200,000-1M CFU/ml) | 8.5 | 10.8 | 12.3 | 11.4 |
| Grade III (1-2M CFU/ml) | 6.1 | 6.5 | 0 | 3.4 |
| Non-compliant (>2M CFU/ml) | 56.1 | 58.1 | 68.5 | 60.2 |

*colony forming unit

## References

1 International Livestock Research Institute. MoreMilk workshop: Participant’s guide. 2019.

2 Gibson RS, Charrondiere UR, Bell W. Measurement Errors in Dietary Assessment Using Self-Reported 24-Hour Recalls in Low-Income Countries and Strategies for Their Prevention. *Adv Nutr* 2017; **8**: 980–91.

3 FAO, Government of Kenya. Kenya Food Composition Tables, 2018. Rome, Italy, 2018.

4 Lukmanji Z, Hertzmark E, Mlingi N, Assey V. Tanzania food composition tables. Dar es Salaam Tanzania, 2008 http://scholar.google.com/scholar?hl=en&btnG=Search&q=intitle:Tanzania+Food+Composition+Tables#0 (accessed Feb 4, 2014).

5 Hotz C, Lubowa A, Sison C, Moursi M, Loechl C. A Food Composition Table for Central and Eastern Uganda. Washington, DC; Cali, Columbia: International Food Policy Research Institute (IFPRI); International Center for Tropical Agriculture (CIAT), 2012.

6 U.S. Department of Agriculture - Agricultural Research Service. FoodData Central. fdc.nal.usda.gov. 2019. fdc.nal.usda.gov (accessed Jan 18, 2024).

7 (dataset) Nutrient Data Lab (2017). USDA Table of Nutrient Retention Factors, Release 6 (2007). DOI:https://doi.org/10.15482/USDA.ADC/1409034.

8 Allen L, de Benoist B, Dary O, Hurrell R. Guidelines on  food fortification with  micronutrients. Geneva: World Health Organization and Food and Agriculture Organization of the United Nations, 2006.

9 Charrondiere UR, Haytowitz D, Stadlmayr B. FAO/INFOODS Density Database Version 2.0 (2012) . Rome: FAO, 2012.

10 Rios-Leyvraz M, Yao Q. The Volume of Breast Milk Intake in Infants and Young Children: A Systematic Review and Meta-Analysis. *Breastfeeding Medicine* 2023; **18**: 188–97.

11 Joseph ML, Carriquiry A. A Measurement Error Approach to Assess the Association between Dietary Diversity, Nutrient Intake, and Mean Probability of Adequacy1–4. *J Nutr* 2010; **140**: 2094S-2101S.

12 Ruel MT, Alderman H. Nutrition-sensitive interventions and programmes: How can they help to accelerate progress in improving maternal and child nutrition? The Lancet. 2013; **382**: 536–51.

13 Allen LH, Carriquiry AL, Murphy SP. Perspective: Proposed Harmonized Nutrient Reference Values for Populations. *Advances in Nutrition* 2020; **11**: 469–83.

14 Scientific Opinion on Dietary Reference Values for iron. *EFSA Journal* 2015; **13**: 4254.

15 Institute of Medicine (US) Panel on Micronutrients. Dietary Reference Intakes for Vitamin A, Vitamin K, Arsenic, Boron, Chromium, Copper, Iodine, Iron, Manganese, Molybdenum, Nickel, Silicon, Vanadium, and Zinc. Washington, D.C.: National Academies Press, 2001 DOI:10.17226/10026.

16 WHO multicentre growth reference study group. WHO Child Growth Standards. *Acta Paediatr Suppl* 2006; **95**: 1–104.

17 Institute of Medicine (US) Subcommittee on Interpretation and Uses of Dietary Reference Intakes, Institute of Medicine (US) Standing Committee on the Scientific Evaluation of Dietary Reference Intakes. Dietary Reference Intakes: Applications in Dietary Assessment. Washington, D.C.: National Academies Press, 2000 DOI:10.17226/9956.

18 Goldberg GR, Black AE, Jebb SA, *et al.* Critical evaluation of energy intake data using fundamental principles of energy physiology: 1. Derivation of cut-off limits to identify under-recording. *Eur J Clin Nutr* 1991; **45**.

19 Black AE, Goldberg GR, Jebb SA, Livingstone MBE, Cole TJ, Prentice AM. Critical evaluation of energy intake data using fundamental principles of energy physiology: 2. Evaluating the results of published surveys. *Eur J Clin Nutr* 1991; **45**.

20 Börnhorst C, Huybrechts I, Hebestreit A, *et al.* Diet–obesity associations in children: approaches to counteract attenuation caused by misreporting. *Public Health Nutr* 2013; **16**: 256–66.

21 Arimond M, Wiesmann D, Becquey E, *et al.* Dietary Diversity as a Measure of the Micronutrient Adequacy of Women’s Diets in Resource-Poor Areas: Summary of Results from Five Sites. Washington, DC, 2011.

22 Food and Agricutural Organization. Human energy requirements: Report of a Joint FAO/WHO/UNU Expert Consultation. Rome, 2004.

23 Coates J, Swindale A, Bilinsky P. Household Food Insecurity Access Scale (HFIAS) for measurement of food access: indicator guide. Washington D.C., 2007.

24 LEE DS. Training, Wages, and Sample Selection: Estimating Sharp Bounds on Treatment Effects. *Review of Economic Studies* 2009; **76**: 1071–102.

25 East African Community. East African Standard. Raw cow milk - specification. ; **EAS 67:2006**.
